# Supplementary material
Source: Springer Nature journal article supplement (https://www.springermedizin.de/resource/supplementary/12889_2011_3331_MOESM2_ESM.pdf/9488846)

Stupid

Bold

Loser

Macho

Immoral

Sophisticated

Lacks confidence

Smart

Successful

Intelligent

----- Perceptions of male adolescents      ——— Perceptions of female adolescents

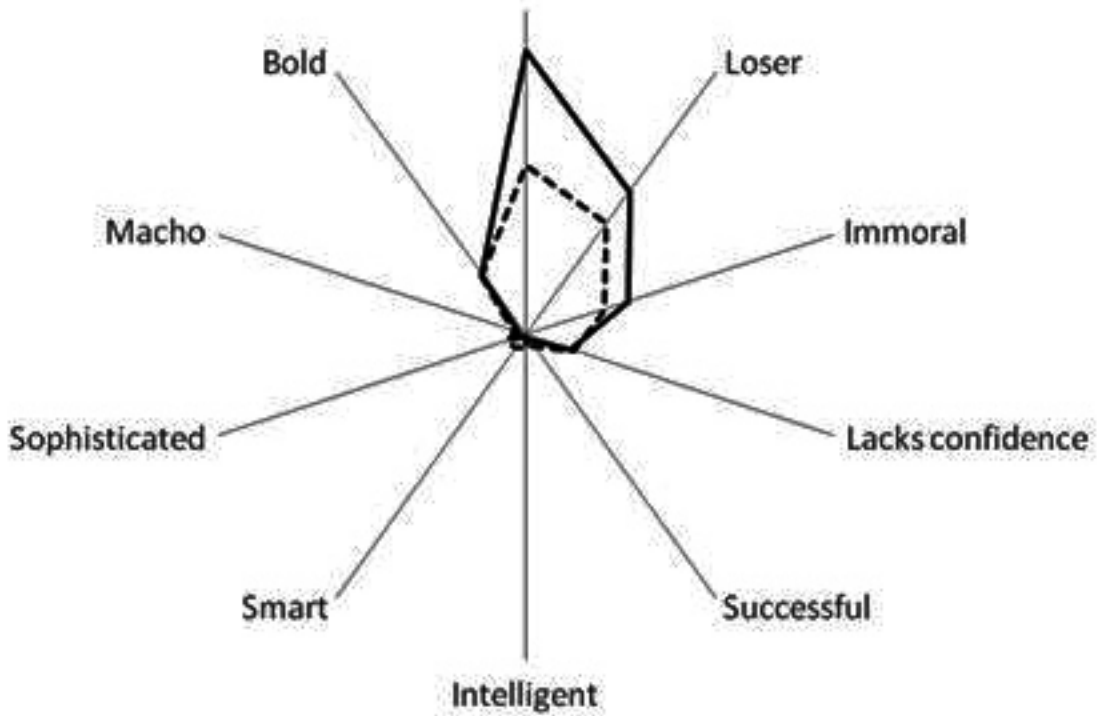

Supplement: MOESM2 [file 9488846]
